# Supplementary material for: Lateral migration of electrospun hydrogel nanofilaments in an oscillatory flow
Source: PLOS journal article supplement (doi:10.1371/journal.pone.0187815), 2017-11-15
Supplement: S1 (10.1371/journal.pone.0187815.s001) [file journal.pone.0187815.s001]

## S1. Electrospinning chamber

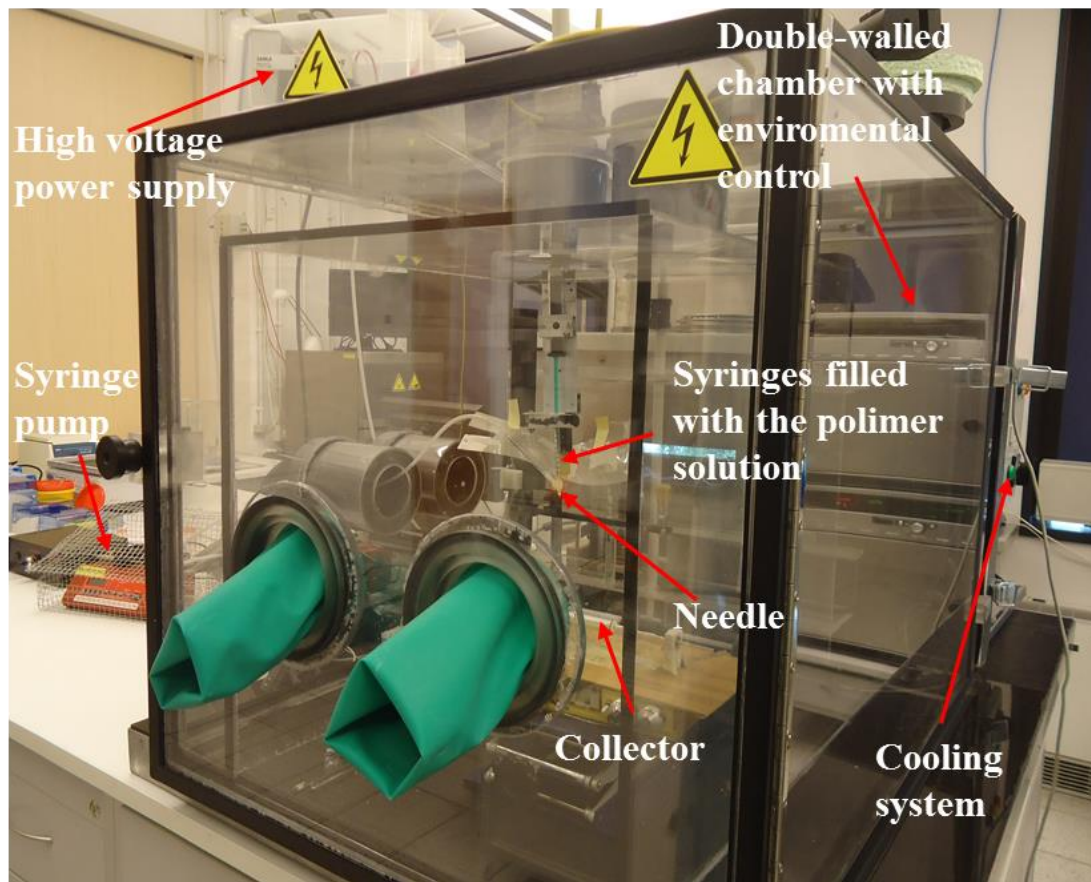

Electrospinning environmental chamber constructed at IPPT PAN

The collector is a rotating drum with a diameter of 9 mm, which rotates at a present 2000 rpm speed and moves also in a direction perpendicular to the direction of polymeric nanofibers stretching. Such a collector movement makes possible to evenly distribute fibers.

Nanofibres were electrospun using a vertical co-axial setup with the outer layer flow rate ( $Q_{\text{shell}}$ ) of  $= 1500 \mu\text{l/h}$ . The core solution flow rate was set to  $Q_{\text{core}} = 1500 \mu\text{l/h}$ . Electrospinning was performed at a positive voltage of  $V = 15 \text{ kV}$ . Nanofibres were collected onto a microscope slide and on the rotating drum (2000 rpm), covered with 3 cm width grounded aluminium foil. Temperature and humidity during electrospinning were  $T = 25^\circ\text{C}$  and  $h = 45\%$ , respectively.
