# Supplementary material for: Lateral migration of electrospun hydrogel nanofilaments in an oscillatory flow
Source: PLOS journal article supplement (doi:10.1371/journal.pone.0187815), 2017-11-15
Supplement: S6 (10.1371/journal.pone.0187815.s006) [file journal.pone.0187815.s006]

**S1 Fig. Pulsate pump**

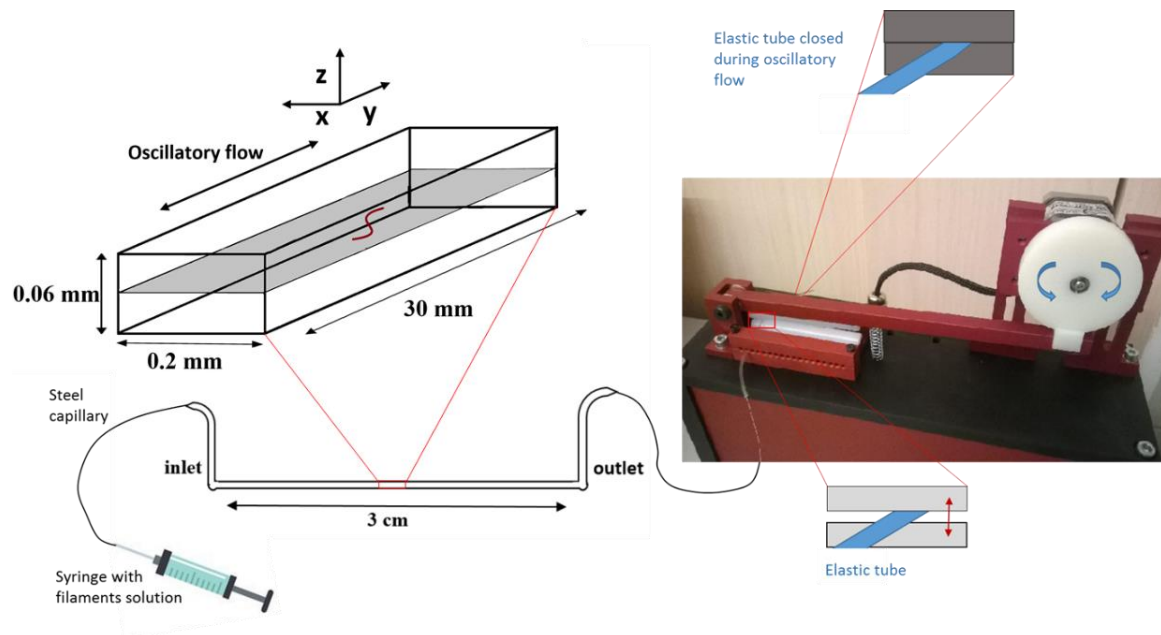

Computer controlled pulsating pump based on periodic squeezing of elastic tube by rotating wheel. Own construction by K. Z.
